# Supplementary material
Source: publisher figshare collection journal article supplement (https://asha.figshare.com/articles/dataset/_/14963505)
Supplement: Supplementary file 1 [file 1]

**Supplementary Table 1.** MD families.

| Reference                          | Family | Number of definite MD patients |               |               |
|------------------------------------|--------|--------------------------------|---------------|---------------|
|                                    |        | Males                          | Females       | Total         |
| Hietikko et al. 2011 <sup>12</sup> | 1*     | 1                              | 2             | 3             |
|                                    | 2*     | 1                              | 2             | 3             |
|                                    | 3*     | 1                              | 2             | 3             |
|                                    | 4*     | 0                              | 5             | 5             |
|                                    | 5      | 0                              | 2             | 2             |
|                                    | 6*     | 2                              | 2             | 4             |
|                                    | 7      | 0                              | 3             | 3             |
|                                    | 8      | 2                              | 1             | 3             |
|                                    | 9      | 3                              | 1             | 4             |
|                                    | 10     | 1                              | 2             | 3             |
|                                    | 11     | 2                              | 2             | 4             |
|                                    | 12     | 0                              | 2             | 2             |
|                                    | 13     | 0                              | 2             | 2             |
|                                    | 14     | 1                              | 2             | 3             |
|                                    | 15     | 1                              | 1             | 2             |
|                                    | 16     | 0                              | 3             | 3             |
| Hietikko et al. 2013 <sup>18</sup> | 1      | 1                              | 3             | 4             |
|                                    | 2      | 1                              | 2             | 3             |
|                                    | 3      | 1                              | 1             | 2             |
|                                    | 4      | 1                              | 1             | 2             |
|                                    | 5      | 0                              | 2             | 2             |
|                                    | 6      | 0                              | 2             | 2             |
|                                    | 7      | 1                              | 1             | 2             |
|                                    | 8      | 1                              | 1             | 2             |
|                                    | 9      | 2                              | 0             | 2             |
|                                    | 10     | 1                              | 3             | 4             |
|                                    | 11     | 0                              | 2             | 2             |
|                                    | 12     | 2                              | 1             | 3             |
|                                    | 13     | 3                              | 0             | 3             |
|                                    | 14     | 1                              | 1             | 2             |
|                                    | 15     | 1                              | 1             | 2             |
|                                    | 16     | 1                              | 1             | 2             |
| The present study                  | 1*     | 2                              | 0             | 2             |
|                                    | 2*     | 0                              | 3             | 3             |
|                                    | 3*     | 1                              | 1             | 2             |
|                                    | 4*     | 1                              | 1             | 2             |
|                                    | 5*     | 0                              | 2             | 2             |
|                                    | 6*     | 1                              | 1             | 2             |
| Total                              |        | 37<br>(36.6%)                  | 64<br>(63.4%) | 101<br>(100%) |

\*Pedigrees are presented in Figures 1 and 2.
